# Supplementary material for: Development and Validation of a Mucosal Antibody (IgA) Test to Identify Persistent Infection with Foot-and-Mouth Disease Virus
Source: MDPI journal article supplement (doi:10.3390/v13050814), 2021-05-01
Supplement: s1 [file s1]

**Table S1:** Principal outcomes of four O1 Manisa/ O UKG vaccine challenge experiments. Four O1 Manisa/O UKG vaccine challenge experiments were carried out in the bio-security containment facility; Pirbright Labrotary, U.K. Animals in each experiment were assigned with 2 letter identifiers (UV, UY, VD/VE, and VH).

| <b>Animal Experiment</b> |                     |                              |                                             |                                            | <b>No. of<br/>Vaccinated<br/>carriers by<br/>VI+RT-PCR</b> | <b>No of<br/>unvaccinated<br/>carriers by<br/>VI+RT-PCR</b> |
|--------------------------|---------------------|------------------------------|---------------------------------------------|--------------------------------------------|------------------------------------------------------------|-------------------------------------------------------------|
| <b>Animal I.D.</b>       | <b>Vaccine Dose</b> | <b>No. of<br/>Vaccinates</b> | <b>No. of<br/>unvaccinated<br/>controls</b> | <b>Days post<br/>vaccine<br/>challenge</b> |                                                            |                                                             |
| UV                       | 1X O1 Manisa        | 20                           | 5                                           | 21                                         | 9                                                          | 2                                                           |
| UY                       | 10x O1 Manisa       | 20                           | 5                                           | 21                                         | 3                                                          | 0                                                           |
| VD/VE                    | 10x O1 Manisa       | 20                           | 5                                           | 10                                         | 11                                                         | 1                                                           |
| VH                       | 1x O1 Manisa        | 20                           | 5                                           | 10                                         | 9                                                          | 2                                                           |
